# Supplementary material for: Observations of PAN and its confinement in the Asian summer monsoonanticyclone in high spatial resolution
Source: Copernicus journal article supplement (doi:10.5194/acp-16-8389-2016), 2016-07-12
Supplement: Supplementary file 1 [file acp-16-8389-2016-supplement.zip]

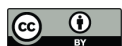

*Supplement of*

## **Observations of PAN and its confinement in the Asian summer monsoon anticyclone in high spatial resolution**

**Jörn Ungermann et al.**

*Correspondence to:* Jörn Ungermann ([j.ungermann@fz-juelich.de](mailto:j.ungermann@fz-juelich.de))

- [acp-16-8389-2016-supplement-title-page.pdf](#)
- [data.nc](#)

The copyright of individual parts of the supplement might differ from the CC-BY 3.0 licence.
